# Supplementary material for: Two-Level Scheduling for Video Transmission over Downlink OFDMA Networks
Source: PLoS One. 2016 Feb 23;11(2):e0148625. doi: 10.1371/journal.pone.0148625 (PMC4764368; doi:10.1371/journal.pone.0148625)
Supplement: S1 Dataset — (XLSX) [file pone.0148625.s001.xlsx]

## Sheet: Sheet1
						This file contains the data of an article titled “Two-Level Scheduling for Video Transmission over Downlink OFDMA Networks”
						Comparison of different methods in terms of video quality (dB)
																Fig. 4. Frame-by-frame quality over all users for different schemes at overall target BER =1e-2.										Fig. 4. Frame-by-frame quality over all users for different schemes at overall target BER =1e-2.
						Fig. 2. Average PSNR over all users versus overall target BER for different schemes.										(a) Average PSNR per frame.										(b) PSNR standard deviation across all users.
						Overall target BER Method	0.1	0.05	0.025	0.01	0.005	0.0025	0.001			Method Frame Index	UEP-CA	UEP-CA-EPA	CA	MAX						Method Frame Index	UEP-CA	UEP-CA-EPA	CA	MAX
						UEP-CA	19.21	22.57	28.56	30.48	30.41	29.57	28.28			10	33.3991	29.03	27.1844	25.6743						10	5.85725	5.17067	3.82645	4.30688
						UEP-CA-EPA	19.4	20.56	22.59	26.04	27.55	27.96	27.31			11	33.8133	28.7714	27.1533	25.2926						11	5.541	4.66409	4.35765	4.04498
						CA	19.07	20.24	21.8	24.77	27.07	27.41	27.24			12	32.5691	28.7249	26.3055	24.8624						12	5.05349	5.48331	3.13201	4.36589
						MAX	19.17	19.5	20.76	23.24	24.74	26	26.19			13	31.4555	28.8553	26.2888	24.7758						13	4.42531	5.90247	3.29585	4.44221
																14	31.9548	27.8205	26.5161	24.8551						14	4.02269	4.28572	3.02381	4.86621
																15	32.1516	27.5234	26.4214	25.5685						15	4.50341	4.17982	3.41769	5.06496
																16	31.4872	26.9693	25.8062	25.317						16	4.59694	3.63429	3.2632	4.72017
																17	31.4325	27.2868	25.9801	24.799						17	4.5401	3.83522	3.33576	4.32211
						Fig. 3. Average PSNR per video for different schemes at overall target BER =1e-2.										18	32.0115	27.4659	25.8962	24.7216						18	4.6456	3.99168	3.09706	4.21345
						Video index represents 1: foreman, 2: carphone, 3: coastguard, 4: silent, 5: mobile and 6: news.										19	31.948	27.5591	25.9609	24.433						19	4.6885	4.13471	3.11862	4.09906
						Video Index Method	1	2	3	4	5	6	Average			20	32.0114	27.5915	25.406	23.7366						20	4.95975	4.33017	3.30584	3.7705
						UEP-CA	34.648	33.0069	26.5573	33.1865	24.3836	31.1152	30.48			21	31.8553	27.1011	25.6051	23.6998						21	5.0668	4.12323	3.41775	3.84276
						UEP-CA-EPA	26.0414	26.715	23.5736	30.3592	21.2488	28.3075	26.04			22	32.0075	27.0106	25.6336	23.8131						22	5.08756	4.06894	3.03697	4.10541
						CA	24.0709	25.567	22.4013	29.0492	20.6182	26.9304	24.77			23	31.6608	26.7392	25.2581	23.6667						23	5.36844	3.99554	3.28831	4.23667
						MAX	21.6185	23.8917	21.5617	28.0762	17.2258	27.0598	23.24			24	32.2082	26.8455	25.4728	23.8173						24	5.04432	4.27697	3.39451	4.09799
																25	31.6994	26.764	25.4691	23.8007						25	4.91879	3.93099	3.50248	3.65271
																26	31.4196	25.8804	25.0665	23.4557						26	4.26314	3.75649	3.30766	3.6973
																27	30.6879	26.11	24.9443	23.5256						27	4.13872	3.94922	2.84385	3.22696
																28	30.228	25.5771	24.6813	23.2468						28	4.46214	3.69412	2.6643	3.05668
																29	29.8976	25.7637	24.6387	23.2712						29	4.69169	4.0936	2.99279	3.40604
																30	30.2359	25.6656	24.3838	23.2219						30	4.64643	3.67132	2.62812	3.39642
																31	30.5736	25.806	24.5857	23.33						31	4.65151	3.43245	2.56829	3.71387
																32	29.0026	25.5446	24.569	23.3679						32	3.33726	3.30968	2.4991	3.76885
																33	29.1325	25.3598	24.5812	23.4163						33	3.39302	3.21332	3.05719	4.03062
																34	30.3183	25.5506	25.1894	23.9104						34	3.83936	3.05859	3.01297	4.20255
																35	29.3918	25.2274	25.0351	23.6702						35	3.0028	2.79904	3.00671	3.72916
																36	29.3715	25.2463	24.9662	23.5142						36	2.84712	2.83039	2.70889	3.79921
																37	29.263	25.4723	24.8112	23.2552						37	3.11451	3.62504	2.77624	4.17624
																38	30.042	25.5669	24.8213	23.6547						38	3.62964	3.80744	3.16327	4.24064
																39	29.2702	25.2986	24.3872	23.3125						39	2.93435	3.18823	3.14151	3.8028
																40	29.1824	25.8304	24.8931	23.4899						40	2.94213	3.07615	3.07306	3.83483
																41	29.4291	26.2986	24.8138	23.2434						41	2.2744	3.18807	2.81645	3.87575
																42	29.9915	26.1702	24.8296	23.627						42	3.09074	2.43253	3.0436	4.33692
																43	30.1052	25.7576	24.6534	23.4054						43	2.48638	2.37649	2.48767	4.05047
																44	30.4011	26.1538	24.6698	23.5072						44	2.98488	2.14269	2.49435	4.21619
																45	30.8611	26.1082	24.5765	23.8413						45	3.09739	2.14213	2.52521	4.25299
																46	31.1017	26.0929	24.5902	23.8542						46	3.77686	2.11655	2.53006	4.07622
																47	31.7199	25.7902	24.7923	23.4699						47	3.2613	2.43339	3.12541	3.81521
																48	31.8938	25.9354	24.4471	23.3668						48	3.26982	2.77599	2.8124	3.57954
																49	30.5681	25.9988	24.6934	23.4232						49	2.9982	2.75821	2.90176	3.80037
																50	30.7969	25.8972	24.6855	23.3514						50	2.82747	2.69887	2.66197	3.76899
																51	30.667	26.0756	24.719	23.3244						51	3.16109	2.64142	2.75091	4.13705
																52	30.7583	26.5272	24.5325	23.1538						52	2.7536	2.11225	2.24442	4.05358
																53	31.3191	26.5702	24.4239	22.9182						53	4.18085	2.20241	2.52852	4.14878
																54	32.5876	27.3278	25.1118	23.2609						54	4.19478	2.55143	3.4507	3.95044
																55	31.6199	27.2914	24.4693	23.623						55	3.45757	2.61895	2.88177	4.55235
																56	31.0588	27.4036	24.7792	23.2491						56	3.18239	2.50154	2.76199	4.29153
																57	30.6698	26.6637	24.9088	22.8753						57	3.18759	2.69379	3.28489	3.57451
																58	30.2962	26.5533	25.0578	22.9711						58	2.52297	2.14623	3.30941	3.92871
																59	30.179	25.8192	24.284	22.8203						59	3.32935	2.03399	3.09068	3.81796
																60	30.4342	25.596	24.6188	22.5369						60	3.39854	1.77553	2.79066	3.76668
																61	30.3003	25.478	24.6339	22.431						61	3.30192	1.97137	2.51875	3.623
																62	30.3772	25.3433	24.5432	22.2371						62	3.00248	1.77062	2.15877	3.23863
																63	31.0815	25.5031	24.2479	21.8372						63	2.7948	2.06703	2.01606	3.03033
																64	30.9617	25.378	24.4881	21.8628						64	2.89099	2.34568	2.6628	3.38476
																65	31.1778	25.4132	24.0854	22.2819						65	2.9801	2.64167	2.3339	3.54683
																66	30.8426	25.1702	24.2036	21.9881						66	2.43088	2.39885	1.79212	3.38686
																67	31.2896	24.9849	24.0548	22.2028						67	3.20439	2.74153	2.53856	3.41154
																68	29.9225	24.9922	24.0782	21.4656						68	2.50781	2.60236	2.30232	3.46772
																69	29.6883	25.2935	23.9842	21.83						69	3.61307	3.31628	2.88061	3.88484
																70	29.5618	25.0319	23.6889	22.0112						70	3.13086	3.25618	2.91091	3.93093
																71	29.9573	25.8072	23.8899	22.2123						71	2.59444	2.92048	3.00679	3.68776
																72	29.9324	25.7231	23.4223	22.1413						72	2.49824	2.59519	3.07904	3.40495
																73	29.0119	26.0824	23.3294	22.2047						73	3.11926	3.33721	3.25209	3.35766
																74	28.497	25.9321	23.4049	22.1551						74	4.55981	3.82128	3.38152	3.81906
																75	29.0972	25.6737	23.2731	22.2169						75	5.08623	4.03533	3.51508	4.08825
																76	29.1909	24.9158	23.2207	21.9437						76	5.14247	3.83064	3.3438	3.86419
																77	29.2571	24.851	23.2919	22.1002						77	5.37159	3.53774	3.35371	3.69953
																78	29.3774	24.8589	23.269	22.3234						78	5.58656	3.55006	3.24221	3.82875
																79	29.305	24.3417	23.2561	22.1312						79	5.41629	3.25217	3.05598	3.73072
																80	28.5726	24.461	23.2359	22.0026						80	5.77662	4.00115	2.9999	3.21325
																81	29.2412	24.4436	23.1368	21.7132						81	6.03047	3.61649	2.70849	3.24831
																82	29.5989	24.4085	23.0885	21.5892						82	5.89269	3.49633	2.39856	3.22585
																83	30.3151	24.0207	23.0611	21.6779						83	5.76502	2.99166	2.39687	3.3303
																84	29.905	24.3817	23.4195	21.9566						84	5.28136	2.78085	2.19071	3.20663
																85	30.0724	24.2367	23.362	21.7997						85	5.57826	3.335	2.4163	3.24738
																86	29.6772	24.4494	23.5703	21.3605						86	4.91841	3.48297	2.78641	3.28318
																87	29.523	24.3293	23.4192	21.407						87	5.3392	3.146	2.53998	3.63604
																88	29.0616	24.1589	23.1793	21.2016						88	5.28755	3.04263	2.43852	3.27998
																89	29.0665	24.3397	23.6313	21.2033						89	4.96664	2.99067	2.88222	3.21341
																90	29.4594	24.4158	23.6785	21.098						90	5.19558	2.88844	2.49688	3.00706
